# Supplementary material for: Metabolic correlates of subcutaneous and visceral abdominal fat measured by ultrasonography: a comparison with waist circumference
Source: PubMed Central journal article supplement (PMC4702394; doi:10.1186/s12937-015-0120-2), 2016-01-06
Supplement: 12937_2015_120_MOESM1_ESM.pdf [file 12937_2015_120_MOESM1_ESM.pdf]

### Additional file 1: Table S1

Multivariable logistic regression models developed for studying the association between the 4 parameters of interest and the 8 outcomes

| High triglycerides        |                                    |                              |                              |                              |
|---------------------------|------------------------------------|------------------------------|------------------------------|------------------------------|
|                           | Model 1<br>WC                      | Model 2<br>logVAT            | Model 3<br>SAT               | Model 4<br>logVAT + SAT      |
| WC <sup>-1</sup> (cm)     | -448.02***<br>[-537.04 to -359.00] | —                            | —                            | —                            |
| Male gender               | 0.67***<br>[0.44 to 0.91]          | 0.61***<br>[0.36 to 0.85]    | 1.25***<br>[1.04 to 1.47]    | 0.62***<br>[0.37 to 0.88]    |
| Age/10 (years)            | 0.15**<br>[0.05 to 0.25]           | 0.09<br>[-0.02 to 0.19]      | 0.30***<br>[0.21 to 0.39]    | 0.10<br>[-0.01 to 0.20]      |
| log <sub>e</sub> VAT (cm) | —                                  | 1.62***<br>[1.31 to 1.93]    | —                            | 1.59***<br>[1.27 to 1.92]    |
| SAT (cm)                  | —                                  | —                            | 0.17***<br>[0.09 to 0.26]    | 0.04<br>[-0.06 to 0.13]      |
| Intercept                 | 2.24***<br>[1.13 to 3.34]          | -4.84***<br>[-5.40 to -4.28] | -3.72***<br>[-4.22 to -3.22] | -4.96***<br>[-5.55 to -4.36] |
| <i>N</i>                  | 2414                               | 2414                         | 2414                         | 2414                         |

\*  $p < 0.05$ , \*\*  $p < 0.01$ , \*\*\*  $p < 0.001$  (Wald test)

Values are logistic regression coefficients (logits) and 95% confidence intervals

| Low HDL               |                                    |                              |                              |                              |
|-----------------------|------------------------------------|------------------------------|------------------------------|------------------------------|
|                       | Model 1<br>WC                      | Model 2<br>Logvat            | Model 3<br>SAT               | Model 4<br>logVAT + SAT      |
| WC <sup>-1</sup> (cm) | -446.75***<br>[-528.57 to -364.94] | —                            | —                            | —                            |
| Male gender           | -0.18<br>[-0.42 to 0.06]           | -0.16<br>[-0.40 to 0.09]     | 0.43***<br>[0.21 to 0.64]    | -0.14<br>[-0.39 to 0.11]     |
| Age/10 (years)        | -0.19***<br>[-0.28 to -0.10]       | -0.23***<br>[-0.32 to -0.13] | -0.03<br>[-0.11 to 0.06]     | -0.22***<br>[-0.31 to -0.12] |
| Log <sub>e</sub> VAT  | —                                  | 1.35***<br>[1.08 to 1.62]    | —                            | 1.32***<br>[1.04 to 1.61]    |
| SAT                   | —                                  | —                            | 0.17***<br>[0.09 to 0.25]    | 0.03<br>[-0.06 to 0.12]      |
| Intercept             | 4.07***<br>[3.05 to 5.09]          | -2.67***<br>[-3.14 to -2.20] | -1.90***<br>[-2.35 to -1.46] | -2.77***<br>[-3.28 to -2.25] |
| <i>N</i>              | 2414                               | 2414                         | 2414                         | 2414                         |

\*  $p < 0.05$ , \*\*  $p < 0.01$ , \*\*\*  $p < 0.001$  (Wald test)

Values are logistic regression coefficients (logits) and 95% confidence intervals.

| High blood pressure       |                                    |                              |                              |                              |
|---------------------------|------------------------------------|------------------------------|------------------------------|------------------------------|
|                           | Model 1<br>WC                      | Model 2<br>logVAT            | Model 3<br>SAT               | Model 4<br>logVAT + SAT      |
| WC <sup>-1</sup> (cm)     | -606.56***<br>[-684.87 to -528.26] | —                            | —                            | —                            |
| Male gender               | 0.67***<br>[0.44 to 0.91]          | 0.83***<br>[0.59 to 1.06]    | 1.53***<br>[1.31 to 1.74]    | 0.99***<br>[0.75 to 1.23]    |
| Age (years/10)            | 0.57***<br>[0.48 to 0.66]          | 0.54***<br>[0.45 to 0.63]    | 0.78***<br>[0.69 to 0.86]    | 0.63***<br>[0.54 to 0.72]    |
| Log <sub>e</sub> VAT (mm) | —                                  | 1.52***<br>[1.29 to 1.74]    | —                            | 1.25***<br>[1.01 to 1.48]    |
| SAT (mm)                  | —                                  | —                            | 0.47***<br>[0.39 to 0.55]    | 0.34***<br>[0.25 to 0.42]    |
| Intercept                 | 3.96***<br>[3.00 to 4.92]          | -4.80***<br>[-5.26 to -4.34] | -4.95***<br>[-5.44 to -4.45] | -5.80***<br>[-6.34 to -5.27] |
| <i>N</i>                  | 2414                               | 2414                         | 2414                         | 2414                         |

\*  $p < 0.05$ , \*\*  $p < 0.01$ , \*\*\*  $p < 0.001$  (Wald test)

Values are logistic regression coefficients (logits) and 95% confidence intervals.

| High glucose              |                                    |                              |                              |                              |
|---------------------------|------------------------------------|------------------------------|------------------------------|------------------------------|
|                           | Model 1<br>WC                      | Model 2<br>logVAT            | Model 3<br>SAT               | Model 4<br>logVAT + SAT      |
| WC <sup>-1</sup> (cm)     | -512.16***<br>[-598.06 to -426.26] | —                            | —                            | —                            |
| Male gender               | 0.38**<br>[0.15 to 0.61]           | 0.40***<br>[0.16 to 0.64]    | 1.06***<br>[0.86 to 1.26]    | 0.44***<br>[0.20 to 0.68]    |
| Age (years/10)            | 0.52***<br>[0.43 to 0.61]          | 0.48***<br>[0.38 to 0.57]    | 0.67***<br>[0.58 to 0.76]    | 0.50***<br>[0.40 to 0.60]    |
| Log <sub>e</sub> VAT (mm) | —                                  | 1.58***<br>[1.30 to 1.85]    | —                            | 1.51***<br>[1.23 to 1.80]    |
| SAT (mm)                  | —                                  | —                            | 0.22***<br>[0.14 to 0.30]    | 0.08<br>[-0.00 to 0.17]      |
| Intercept                 | 1.92***<br>[0.90 to 2.93]          | -5.85***<br>[-6.43 to -5.27] | -4.89***<br>[-5.42 to -4.37] | -6.11***<br>[-6.75 to -5.47] |
| <i>N</i>                  | 2414                               | 2414                         | 2414                         | 2414                         |

\*  $p < 0.05$ , \*\*  $p < 0.01$ , \*\*\*  $p < 0.001$  (Wald test)

Values are logistic regression coefficients (logits) and 95% confidence intervals

| Metabolic syndrome        |                              |                              |                              |
|---------------------------|------------------------------|------------------------------|------------------------------|
|                           | Model 2<br>logVAT            | Model 3<br>SAT               | Model 4<br>logVAT + SAT      |
| WC <sup>-1</sup> (cm)     | —                            | —                            | —                            |
| Male gender               | 0.17<br>[-0.07 to 0.41]      | 1.29***<br>[1.09 to 1.50]    | 0.32*<br>[0.07 to 0.56]      |
| Age (years/10)            | 0.30***<br>[0.20 to 0.40]    | 0.65***<br>[0.56 to 0.74]    | 0.39***<br>[0.29 to 0.49]    |
| Log <sub>e</sub> VAT (mm) | 2.87***<br>[2.54 to 3.20]    | —                            | 2.70***<br>[2.36 to 3.04]    |
| SAT (mm)                  | —                            | 0.46***<br>[0.37 to 0.54]    | 0.28***<br>[0.19 to 0.38]    |
| Intercept                 | -7.14***<br>[-7.77 to -6.51] | -5.47***<br>[-5.98 to -4.95] | -8.15***<br>[-8.83 to -7.47] |
| <i>N</i>                  | 2414                         | 2414                         | 2414                         |

\*  $p < 0.05$ , \*\*  $p < 0.01$ , \*\*\*  $p < 0.001$  (Wald test)

Values are logistic regression coefficients (logits) and 95% confidence intervals

| High uric acid            |                                    |                              |                              |                              |
|---------------------------|------------------------------------|------------------------------|------------------------------|------------------------------|
|                           | Model 1<br>WC                      | Model 2<br>logVAT            | Model 3<br>SAT               | Model 4<br>logVAT + SAT      |
| WC <sup>-1</sup> (cm)     | -456.80***<br>[-606.76 to -306.83] | —                            | —                            | —                            |
| Male gender               | 1.85***<br>[1.45 to 2.24]          | 1.89***<br>[1.46 to 2.31]    | 2.40***<br>[2.05 to 2.75]    | 1.88***<br>[1.44 to 2.31]    |
| Age (years/10)            | 0.17*<br>[0.03 to 0.31]            | 0.14<br>[-0.01 to 0.28]      | 0.30***<br>[0.16 to 0.43]    | 0.13<br>[-0.01 to 0.28]      |
| Log <sub>e</sub> VAT (mm) | —                                  | 1.32***<br>[0.83 to 1.82]    | —                            | 1.33***<br>[0.82 to 1.85]    |
| SAT (mm)                  | —                                  | —                            | 0.07<br>[-0.05 to 0.19]      | -0.02<br>[-0.15 to 0.11]     |
| Intercept                 | 0.47<br>[-1.27 to 2.22]            | -6.35***<br>[-7.29 to -5.41] | -5.12***<br>[-5.88 to -4.35] | -6.29***<br>[-7.27 to -5.31] |
| <i>N</i>                  | 2414                               | 2414                         | 2414                         | 2414                         |

\*  $p < 0.05$ , \*\*  $p < 0.01$ , \*\*\*  $p < 0.001$  (Wald test)

Values are logistic regression coefficients (logits) and 95% confidence intervals

| High ALT              |                                    |                              |                              |                              |
|-----------------------|------------------------------------|------------------------------|------------------------------|------------------------------|
|                       | Model 1<br>WC                      | Model 2<br>logVAT            | Model 3<br>SAT               | Model 4<br>logVAT + SAT      |
| WC <sup>-1</sup> (cm) | -467.96***<br>[-558.25 to -377.68] | —                            | —                            | —                            |
| Male gender           | 1.32***<br>[1.10 to 1.54]          | 1.24***<br>[1.02 to 1.46]    | 1.91***<br>[1.70 to 2.11]    | 1.29***<br>[1.06 to 1.51]    |
| Age (years/10)        | -0.06<br>[-0.15 to 0.03]           | -0.14**<br>[-0.24 to -0.05]  | 0.12**<br>[0.04 to 0.21]     | -0.11*<br>[-0.21 to -0.02]   |
| Log <sub>e</sub> VAT  | —                                  | 1.80***<br>[1.51 to 2.10]    | —                            | 1.73***<br>[1.43 to 2.03]    |
| SAT                   | —                                  | —                            | 0.24***<br>[0.16 to 0.33]    | 0.10*<br>[0.01 to 0.19]      |
| Intercept             | 3.44***<br>[2.34 to 4.54]          | -4.06***<br>[-4.56 to -3.57] | -3.06***<br>[-3.54 to -2.59] | -4.36***<br>[-4.93 to -3.79] |
| <i>N</i>              | 2414                               | 2414                         | 2414                         | 2414                         |

\*  $p < 0.05$ , \*\*  $p < 0.01$ , \*\*\*  $p < 0.001$  (Wald test)

Values are logistic regression coefficients (logits) and 95% confidence intervals

| High GGT              |                                    |                              |                              |                              |
|-----------------------|------------------------------------|------------------------------|------------------------------|------------------------------|
|                       | Model 1<br>WC                      | Model 2<br>logVAT            | Model 3<br>SAT               | Model 4<br>logVAT + SAT      |
| WC <sup>-1</sup> (cm) | -516.36***<br>[-616.94 to -415.79] | —                            | —                            | —                            |
| Male gender           | 1.17***<br>[0.93 to 1.41]          | 1.09***<br>[0.85 to 1.34]    | 1.79***<br>[1.57 to 2.02]    | 1.13***<br>[0.87 to 1.38]    |
| Age (years/10)        | -0.12*<br>[-0.22 to -0.02]         | -0.21***<br>[-0.31 to -0.10] | 0.07<br>[-0.02 to 0.16]      | -0.18**<br>[-0.29 to -0.07]  |
| logVAT                | —                                  | 1.90***<br>[1.57 to 2.24]    | —                            | 1.85***<br>[1.50 to 2.19]    |
| SAT                   | —                                  | —                            | 0.22***<br>[0.13 to 0.31]    | 0.07<br>[-0.02 to 0.17]      |
| Intercept             | 3.73***<br>[2.52 to 4.93]          | -4.45***<br>[-5.01 to -3.88] | -3.21***<br>[-3.72 to -2.71] | -4.68***<br>[-5.31 to -4.05] |
| <i>N</i>              | 2414                               | 2414                         | 2414                         | 2414                         |

\*  $p < 0.05$ , \*\*  $p < 0.01$ , \*\*\*  $p < 0.001$  (Wald test)

Values are logistic regression coefficients (logits) and 95% confidence intervals
